# Supplementary material for: Efficacy of TIMOLOL nasal spray as a treatment for epistaxis in hereditary hemorrhagic telangiectasia. A double-blind, randomized, placebo-controlled trial
Source: PubMed Central journal article supplement (PMC6700077; doi:10.1038/s41598-019-48502-9), 2019-08-19

## Supplemental material

### **Efficacy of TIMOLOL nasal spray as a treatment for epistaxis in hereditary hemorrhagic telangiectasia.**

#### **A double-blind, randomized, placebo-controlled trial**

Sophie Dupuis-Girod<sup>1</sup>, MD, PhD, Vincent PITIOT<sup>2</sup>, MD, Cyrille BERGEROT<sup>4</sup>, MD, Anne-Emmanuelle Fargeton<sup>1</sup>, MsC, Marjolaine Beaudoin<sup>1</sup>, MsC, Evelyne Decullier<sup>5,6</sup>, PhD, Valentine Bréant<sup>7</sup>, Pharm D, Bettina Colombet<sup>7</sup>, Pharm D, Pierre Philouze<sup>3</sup>, MD, Frédéric Faure<sup>2</sup>, MD, PhD and Jean-Charles Letievant<sup>2</sup>, MD.

1. Hospices Civils de Lyon, Hôpital Femme-Mère-Enfants, Service de Génétique et centre de référence de la maladie de Rendu-Osler, Bron F-69677,
2. Hospices Civils de Lyon, Hôpital E. Herriot, Service d'ORL, Lyon, F-69437
3. Hospices Civils de Lyon, Hôpital de la Croix Rousse, Service d'ORL, Lyon F-69317
4. Hospices Civils de Lyon, Hôpital Louis Pradel, Service de cardiologie, Lyon F-69677
5. Hospices Civils de Lyon, pôle Santé Publique, Lyon, F-69003
6. Université Lyon 1, F-69008
7. Hospices Civils de Lyon, Pharmacie, Hôpital Louis Pradel, Bron, F-69677

Supplemental material

Figure 3: SF36 score before and after treatment in the placebo (A) and timolol (B) groups.

A

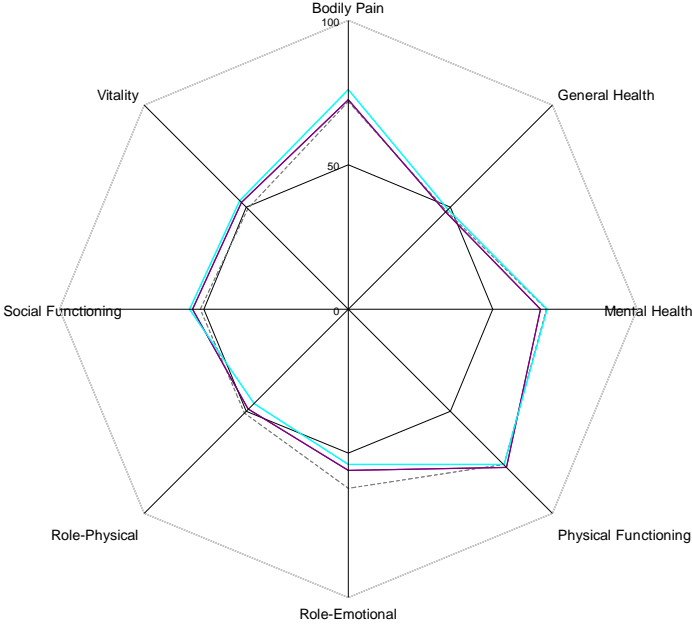

B

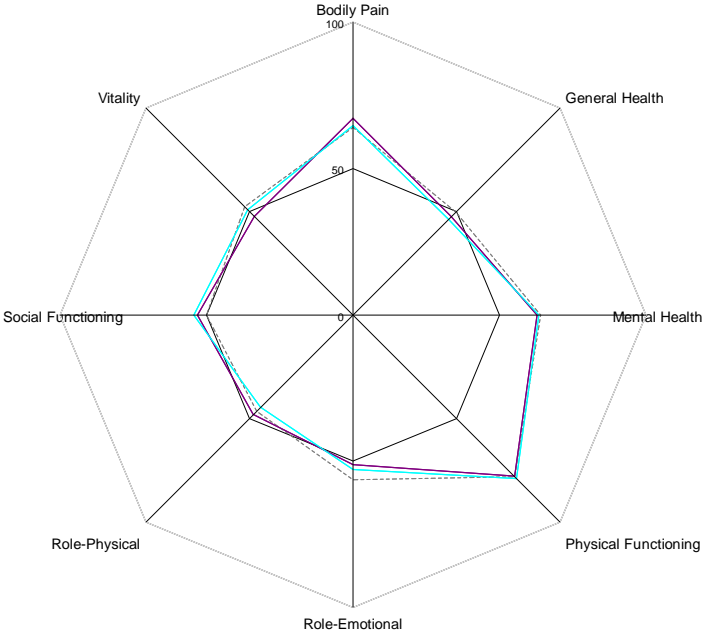

- Legends:**
- SF36 at inclusion
  - SF36 at 4 months after inclusion
  - SF36 at 7 months after inclusion

Supplemental material

Figure 4: Epistaxis duration and cardiac frequency in the 2 patients who experienced bradycardia during treatment

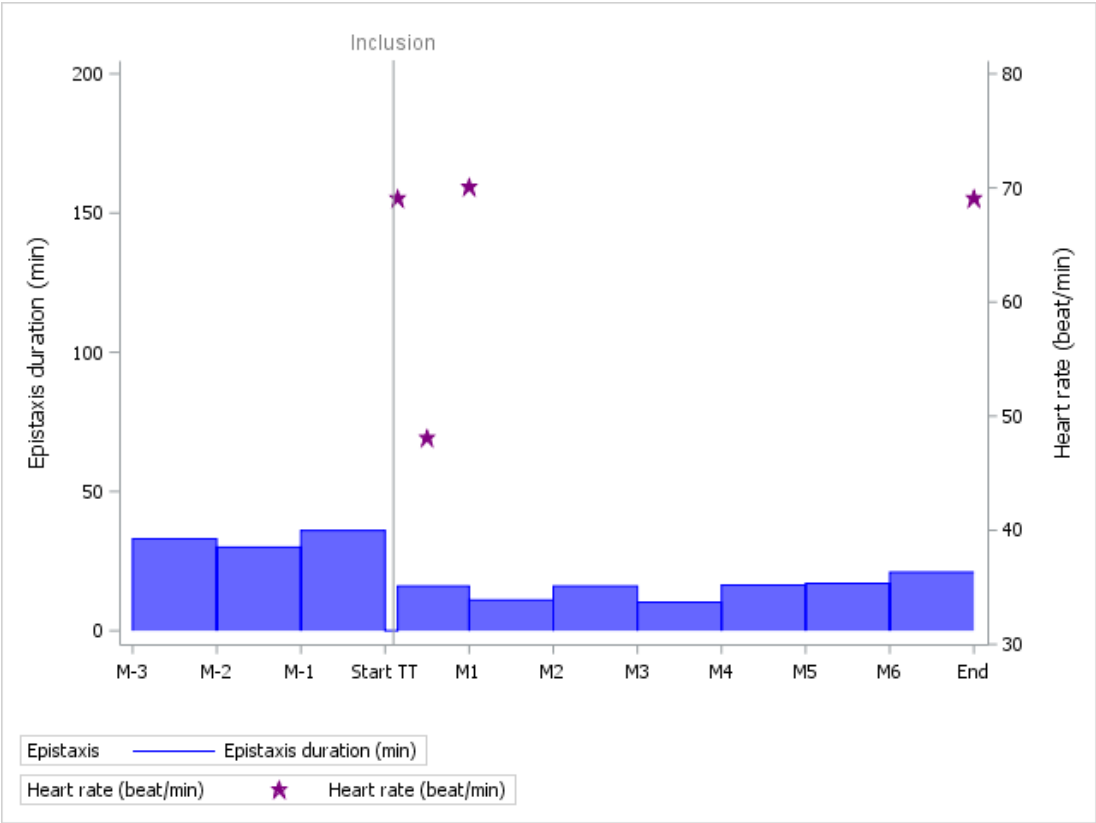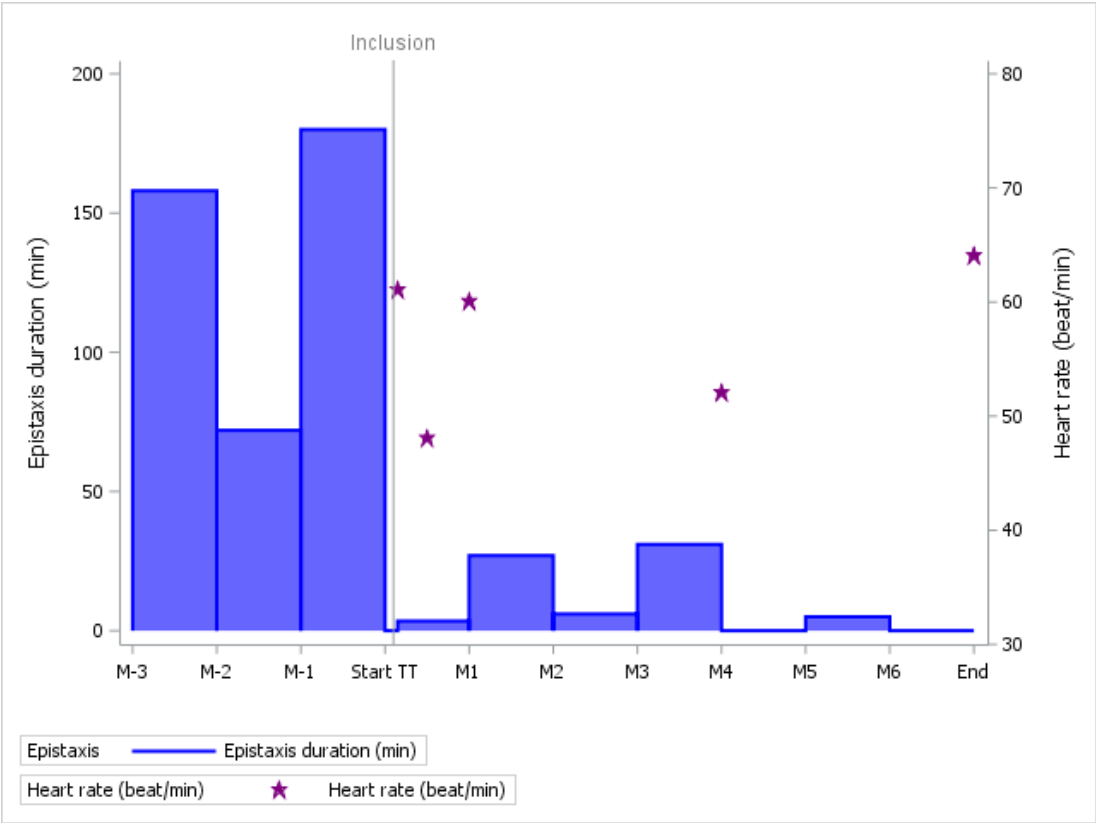

Supplement: 41598_2019_48502_MOESM1_ESM.pdf [file 41598_2019_48502_MOESM1_ESM.pdf]
